1 **Title:** Targeted sequence capture outperforms RNA-Seq and degenerate-primer PCR cloning for  
2 sequencing the largest mammalian multi-gene family

3 **Authors:** Laurel R. Yohe<sup>1, 2</sup>, Kalina T. J. Davies<sup>3</sup>, Nancy B. Simmons<sup>4</sup>, Karen E. Sears<sup>5</sup>, Elizabeth R.  
4 Dumont<sup>6</sup>, Stephen J. Rossiter<sup>3</sup>, & Liliana M. Dávalos<sup>1, 7</sup>

5 **Affiliations:**

6 <sup>1</sup> Department of Ecology and Evolution, Stony Brook University, Stony Brook, NY 11794, USA

7 <sup>2</sup> Department of Geology and Geophysics, Yale University, Stony Brook, NY 11794, USA

8 <sup>3</sup> School of Biological and Chemical Sciences, Queen Mary University of London, London, E1 4NS,  
9 United Kingdom

10 <sup>4</sup> Department of Mammalogy, Division of Vertebrate Zoology, American Museum of Natural History,  
11 New York, NY 10024, USA

12 <sup>5</sup> Department of Ecology and Evolutionary Biology, UCLA, Los Angeles, CA 90095, USA

13 <sup>6</sup> School of Natural Sciences, University of California Merced, Merced, CA, 95343, USA

14 <sup>7</sup> Consortium for Inter-Disciplinary Environmental Research, Stony Brook University, Stony Brook, NY  
15 11794, USA

16 **Email addresses:**

17 LRY: [laurel.yohe@yale.edu](mailto:laurel.yohe@yale.edu); [laurel.yohe@stonybrook.edu](mailto:laurel.yohe@stonybrook.edu)

18 KJD: [k.t.j.davies@qmul.ac.uk](mailto:k.t.j.davies@qmul.ac.uk)

19 NBS: [simmons@amnh.org](mailto:simmons@amnh.org)

20 KES: [ksears@ucla.edu](mailto:ksears@ucla.edu)

21 ERD: [edumont@ucmerced.edu](mailto:edumont@ucmerced.edu)

22 SJR: [s.j.rossiter@qmul.ac.uk](mailto:s.j.rossiter@qmul.ac.uk)

23 LMD: [liliana.davalos@stonybrook.edu](mailto:liliana.davalos@stonybrook.edu)

24 **Data availability:** RNA-seq raw reads were deposited to the NCBI GenBank Sequence Read Archive  
25 (SRR8878915) and the assembled transcriptome was deposited to the NCBI GenBank Transcriptome  
26 Shotgun Assembly database (PRJNA531931).

27 **Short Title:** Sequencing approaches of multigene families

28 **Keywords:** transcriptome, targeted sequence capture, olfactory receptor, multigene family, gene family

29 evolution, genome

30 **Corresponding Author:**

31 Laurel R. Yohe

32 210 Whitney Ave, New Haven, CT 06511

33 phone: (631) 632-8600; fax: (631) 632-7626

34 [laurel.yohe@yale.edu](mailto:laurel.yohe@yale.edu)

35

36 **Abstract**

37 Multigene families evolve from single-copy ancestral genes via duplication, and typically encode proteins  
38 critical to key biological processes. Molecular analyses of these gene families require high-confidence  
39 sequences, but the high sequence similarity of the members can create challenges for both sequencing and  
40 downstream analyses. Focusing on the common vampire bat, *Desmodus rotundus*, we evaluated how  
41 different sequencing approaches performed in recovering the largest mammalian protein-coding  
42 multigene family: *olfactory receptors (OR)*. Using the common vampire bat genome as a reference, we  
43 determined the proportion of putatively protein-coding receptors recovered by: 1) amplicons from  
44 degenerate primers sequenced via Sanger technology, 2) RNA-Seq of the main olfactory epithelium, and  
45 3) those genes “captured” with probes designed from transcriptomes of closely-related species. Our initial  
46 re-annotation of the high-quality vampire bat genome resulted in >400 intact *OR* genes, more than double  
47 the number based on original estimates. Sanger-sequenced amplicons performed the poorest among the  
48 three approaches, detecting <33% of receptors in the genome. In contrast, the transcriptome reliably  
49 recovered >50% of the annotated genomic *ORs*, and targeted sequence capture recovered nearly 75% of  
50 annotated genes. Each sequencing approach assembled high-quality sequences, even if it did not recover  
51 all putative receptors in the genome. Therefore, variation among assemblies was caused by low coverage  
52 of some receptors, rather than high rates of assembly error. Given this variability, we caution against  
53 using the counts of number of intact receptors per species to model the birth-death process of multigene  
54 families. Instead, our results support the use of orthologous sequences to explore and model the  
55 evolutionary processes shaping these genes.

## 56 **Introduction**

57           Multigene families, or groups of duplicated genes that have evolved from a single ancestral copy,  
58 make up significant proportions of the protein-coding genome across organisms. Many of these gene  
59 families underlie key roles in sensory perception and pathogen recognition (Nei and Rooney 2005; Yohe  
60 *et al.* 2019). However, despite both the biological relevance and prevalence of multigene families, most  
61 sequencing and assembly methods are optimized for single-copy genes. Since assembling highly similar  
62 sequences is inherently problematic, many multigene families assemble poorly (Sims *et al.* 2014; Shi *et*  
63 *al.* 2017). Duplicated genes are often masked from analyses and ignored, or recent gene duplicates may  
64 be collapsed into single-copy genes, thus underestimating their diversity (MacRander *et al.* 2015; Holding  
65 *et al.* 2018). Mapping reads back onto assembled contigs of duplicated genes is an error-prone task,  
66 making it difficult to validate a well-assembled contig (Treangen and Salzberg 2012). This problem is  
67 particularly evident in *de novo* assemblies, for which no reference genomes are available to validate  
68 scaffolds. Even when the genome of a closely related species is available, these regions of the genome  
69 may still be poorly assembled, and their highly repetitive nature results in misleading coverage estimates  
70 (Yoon *et al.* 2009; Sims *et al.* 2014). While all of these issues are well known, there are few comparisons  
71 of different sequencing methods and their performance in reconstructing high quality contigs from highly  
72 similar sequences.

73           The mammalian *olfactory receptor (OR)* gene family shows one of the most extraordinary  
74 patterns of gene duplication in animals (Nei and Rooney 2005), constantly expanding through  
75 duplications and contracting via pseudogenization over time. Olfactory receptors account for 5% of the  
76 mammalian protein-coding genome (Niimura 2012). Olfactory receptors are short ~900 basepair (bp)  
77 intronless G-protein coupled receptors with divergent binding sites that reflect the diversity of potential  
78 odorants to which they bind (Niimura 2012). The variation in the number of receptors among mammals is  
79 enormous—humans have around 400 ORs in their genome, while rodents and elephants have thousands  
80 (Niimura *et al.* 2014). Mammalian olfactory receptors can be classified into distinct subfamilies based on  
81 conserved regions of the genes (Hayden *et al.* 2010). Class I receptors are shared across vertebrates and

82 can be further subdivided into four subfamilies (51, 52, 55, 56), while the much more diverse Class II  
83 subfamilies are mammalian-specific and subdivided into nine subfamilies (1/3/7, 2/13, 4, 5/8/9, 6, 10, 11,  
84 12, and 14) (Hayden *et al.* 2010, 2014). Because of the duplicative nature of these genes, olfactory  
85 receptors pose a challenge to sequence assemblers. It is critical to obtain reliable olfactory receptor  
86 sequences to infer gene duplication and loss, and even for comparing the size of repertoires across  
87 species. Within a population, the sensitivity to odorant stimuli of the same receptor with segregating  
88 alleles is highly variable (Logan 2014; Mainland *et al.* 2014). Thus, accurate and reliable sequences are  
89 also necessary for identifying within-population evolutionary processes that shape chemosensory  
90 receptors.

91         Despite some of the potential problems that emerge from sequencing olfactory receptors, this task  
92 can become tractable with use of proper methodologies and access to genomic resources. Many olfactory  
93 receptors have been identified from available genomes (Niimura *et al.* 2014), but when a reference  
94 genome is unavailable, alternative approaches must be considered. One such approach is to use a set of  
95 degenerate primers to amplify sequences using PCR, followed by cloning and Sanger sequencing  
96 (Hayden *et al.* 2010, 2014). While Sanger sequencing has a very low error rate, primer bias (caused by the  
97 preferential binding of degenerate primers to some genes over others), insufficient sampling of clones, or  
98 insufficient sequencing depth (due to the relatively high cost per base) may limit complete recovery of the  
99 profiles from amplicons (Hayden *et al.* 2010; Hohenbrink *et al.* 2014). By using degenerate primers with  
100 paired-end sequencing platforms such as Illumina (Hughes *et al.* 2013), or with long read technologies  
101 such as PacBio (Larsen *et al.* 2014), it may be possible to increase the number of recovered chemosensory  
102 receptors, however, such high-throughput approaches can introduce higher sequencing error rates without  
103 resolving the problems arising from primer bias. Transcriptomes and targeted sequence capture offer  
104 alternatives to avoid primer bias or insufficient sequencing. When pooling data from multiple individuals,  
105 for example, studies of the mammalian olfactory transcriptome in model organisms detected up to 95% of  
106 intact olfactory receptors. However, all of these studies used well-annotated reference genomes to guide  
107 their assemblies (Shiao *et al.* 2012; Kanageswaran *et al.* 2015; Olender *et al.* 2016). How *de novo*

108 olfactory sequencing assemblies perform in recovery of the hyperdiverse mammalian olfactory receptor  
109 repertoire remains unknown.

110 Here we compare variation in olfactory receptors of *Desmodus rotundus*, the common vampire  
111 bat, recovered from different high-throughput sequencing approaches. *Desmodus rotundus* is the only  
112 vertebrate that feeds exclusively on mammalian blood and, in accordance with its dietary preference, has  
113 highly modified sensory systems including thermosensation (Gracheva *et al.* 2011), reduced taste function  
114 (Hong and Zhao 2014), and distinct olfactory receptors (Hayden *et al.* 2014) . Our main goal is to  
115 determine whether different sequencing approaches can yield representative samples of highly similar  
116 protein-coding genes, even in the absence of a reference genome, and to identify the best assembly  
117 approach to achieve this goal. Our analyses use as a baseline the genome of this species to identify open  
118 reading frames of olfactory receptors (Zepeda Mendoza *et al.* 2018). We then compare three sequencing  
119 strategies: published olfactory receptor sequences amplified via degenerate primers and cloning, and  
120 sequenced using Sanger technology (Hayden *et al.* 2014), *de novo* transcriptome sequences of the main  
121 olfactory epithelium, and targeted sequence capture using probes designed from the transcriptomes of  
122 twelve bat species. To characterize the completeness and sensitivity of different assembly strategies for  
123 one of the most complex gene families in the mammalian genome, we mapped the receptors to the  
124 genome. We discovered significant variation across methods and suggest best practices for subsequent  
125 analyses based on different sequencing and assembly approaches, with implications for downstream  
126 analyses of multigene family evolution.

127

## 128 **Materials and Methods**

129 *Approach:* The following sequencing approaches were compared to assess their ability to recover  
130 maximum representation of high quality olfactory receptor contigs: (1) PCR with degenerate primers and  
131 Sanger sequencing of amplicons (Hayden *et al.* 2014), (2) receptors obtained from Illumina sequencing of  
132 the transcriptome of the main olfactory epithelium, and (3) receptors sequenced from targeted sequence  
133 capture with probes designed from olfactory receptors identified in bat olfactory epithelium

134 transcriptomes (Fig. 1). Because of the duplicative nature of olfactory receptors, careful consideration was  
135 given to designing the pipeline for Illumina read quality control and assembly. Reads that are too short,  
136 too low in quality, or do not have a matching pair, may confound the assembly. The published common  
137 vampire bat genome (*Desmodus rotundus*) served as a validation of correctly assembled olfactory  
138 receptors (Zepeda Mendoza *et al.* 2018). The genome was sequenced using Illumina, and after refinement  
139 by the Dovetail protocol, resulted in ~2Gb genome with a mean coverage of ~233X and a final N50 =  
140 26.9 Mb. Each assembly approach was compared to the genome by mapping assembled contigs to the  
141 olfactory receptor locations in the genome.

142 *Tissue collection:* For RNA-Seq, we generated the tissue-specific transcriptome of the main olfactory  
143 epithelium (MOE) from one male *D. rotundus* (AMNH 278722), collected in Lamanai (Belize) under the  
144 Belize Forestry Department Scientific Research and Collecting Permit CD/60/3/14 (17) and protocols  
145 approved by Institutional Animal Care and Use Committee at Stony Brook University (IACUC: 2012-  
146 1946-NF-4.16.15-BAT). The bat was euthanized using an overdose of isofluorane and the maxilla, that  
147 contains the entire nasal cavity, was immediately removed from the specimen and placed in a vial of  
148 Qiagen RNeasy Lysis Buffer and left to soak overnight at 4°C to allow complete permeation of the tissue. The  
149 following morning, the tissue vial was flash-frozen in liquid nitrogen. Upon returning to the laboratory,  
150 the MOE was dissected in sterile conditions on a dry ice cold counter-top under a dissecting scope and  
151 under the guidance of a published video protocol (Brechtbühl *et al.* 2011). RNA was immediately  
152 extracted after dissection.

153 *RNA extractions:* All RNA extractions were performed using the Qiagen RNeasy Micro Kit (ID: 74004)  
154 and followed the protocol for “Purification of Total RNA from Animal and Human Tissues”. The  
155 following modifications were made to optimize the total RNA from the delicate neural tissue of the MOE.  
156 We added 20 µL of 2M dithiothreitol (DTT) per 1 mL of the lysis buffer, Buffer RLT. Prior to tissue  
157 homogenization, we also added 5 µL of a 4 ng/µL working solution of carrier RNA, as total RNA yields  
158 of neural tissue are generally low (Qiagen RNeasy Micro Handbook). A sterilized glass mortar and pestle  
159 was used for tissue disruption and homogenization by grinding for 5 minutes in Buffer RLT and carrier

160 RNA. The tissues were homogenized by pumping the pestle and shearing the cellular components.  
161 Incubation of the spin columns during the DNase treatment was reduced from 15 to eight minutes.  
162 Finally, during the final extraction step, we eluted with 20  $\mu$ L of RNase-free water and let the water soak  
163 on the spin column membrane for 5 minutes prior to elution.

164 *cDNA library sequencing*: RNA extracts were sent to BGI in China for cDNA library preparation and  
165 Illumina sequencing. RNA concentration, quality, and purity were measured using the Agilent 2100  
166 Bioanalyzer. cDNA libraries were generated using standard BGI in-house protocols. Libraries were  
167 sequenced using Illumina HiSeq™ 4000 to generate 6G of 100 bp paired-end reads per sample.

168 *RNA-Seq assembly*: Using the BBTools bioinformatics package (<https://sourceforge.net/projects/bbmap/>),  
169 low quality reads were filtered using the bbdduk.sh script, in which reads less than 25 bp (minlen = 25)  
170 were discarded. Reads were trimmed from both ends (qtrim = rl) until the average read quality was 10 or  
171 greater (trimq = 10); otherwise, the read was discarded. All other settings for this function were set to  
172 defaults. To assemble the RNA-Seq data *de novo*, the Oyster River Protocol v. 2.1.0 was implemented  
173 (MacManes 2018). This recently developed assembly strategy uses several assembly programs under a  
174 variety of different parameters to overcome the biases incurred by different assembly algorithms (Vijay *et*  
175 *al.* 2013). The Oyster River Protocol streamlines this approach and provides different benchmarking  
176 measures to evaluate the quality of each transcript assembled, as well as overall assembly quality  
177 assessment. Briefly, the protocol performs the following analyses: (1) additional trimming and error  
178 correction; (2) assembly using Trinity v. 2.8.4 (Grabherr *et al.* 2011), Trans-Abyss v. 2.0.1, and SPAdes  
179 v. 3.13.0; (3) merging of assemblies via OrthoFinder v. 2.2.6 (Emms and Kelly 2015); and (4) assembly  
180 evaluation using TransRate v. 1.0.2 (Smith-Unna *et al.* 2016) and BUSCO v. 3.0.1 (Waterhouse *et al.*  
181 2017). The overall TransRate score is calculated using the product of the four following measures: the  
182 proportion of nucleotides with zero coverage, how the bases are ordered correctly based on information  
183 from read pairs, how well the nucleotides of mapped reads match those in the assembled contig, and  
184 univariate coverage depth that quantifies the probability all reads come from the same transcript. Mapping  
185 reads back to the transcriptome can be particularly problematic for duplicated genes, and this TransRate



186 score identifies particularly questionable assembled contigs. BUSCO measures the completeness of each  
187 assembled contig by searching for orthologous annotated proteins and measuring the standard deviation  
188 of each transcript contig from its reciprocal hit in the ortholog database. The assembled transcriptome was  
189 compared against an ortholog database for mammals that includes 4,104 BUSCO groups  
190 (<http://busco.ezlab.org/>).

191 *Olfactory receptor identification*: A published pipeline, Olfactory Receptor family Assigner (ORA) v.  
192 1.9.1, tailored to specifically identify mammalian olfactory receptors and classify each receptor into its  
193 respective subfamily (Hayden *et al.* 2010) was used to characterize the olfactory receptors of each  
194 sequencing approach. ORA is a set of Bioperl (v. 1.006924) scripts that implement hidden Markov  
195 models trained on conserved protein sequence motifs of mammalian olfactory receptors via HMMER v.  
196 3.1b2 (Eddy 2010). This method has been shown to be robust, with low false positives rates, and has been  
197 used to identify olfactory receptors and their open reading frames across mammals, including bats  
198 (Hayden *et al.* 2010, 2014). An E-value threshold of  $1e-10$  for sequences matched in the database was  
199 used. For the transcripts, we discarded all olfactory receptor sequences with open reading frames <650  
200 bp, as it is impossible to distinguish transcribed pseudogenes from degraded transcripts at short lengths.

201 *Comparison with Sanger-sequenced OR amplicons*: A previous study amplified the olfactory receptors of  
202 *D. rotundus* using PCR with two pairs of degenerate primers (for Class I and Class II *OR* genes), isolated  
203 each gene by cloning, and sequenced the receptors using Sanger sequencing (Hayden *et al.* 2014). Given  
204 the low error rates of Sanger sequencing, this provided an opportunity to explore the different methods for  
205 sequencing olfactory receptors, and to assess whether the higher error rates of Illumina significantly  
206 affected sequencing of *OR* genes. As the degenerate primers bind to conserved regions within the reading  
207 frame, recovered sequences were incomplete, only ~700-750 bp (Fig. 1). The amplicons were obtained  
208 using degenerate primers and only a few clones were selected. Since the olfactory receptor repertoire may  
209 be quite large, the amplification step has the potential to introduce primer bias, which is then exacerbated  
210 by reduced representation.

211 *Targeted sequence capture from genomic DNA:* Olfactory receptors identified from the transcriptome  
212 were used to design probes for an olfactory receptor targeted sequence capture. Pooling 3,814  
213 chemosensory genes from twelve species of bats (Table S1), probes were designed from RNA-Seq data to  
214 make 120-bp probes with 2X tiling density. The initial raw number of probes was 45,052, and given the  
215 duplicative nature of the genes, we clustered similar probes with 95% nucleotide identity of one another.  
216 The final probe count was 16,468 custom targets designed for chemosensory genes. All but one species of  
217 bat used in the probe design were sampled from the Noctilionoidea superfamily, a monophyletic clade  
218 that shared a common ancestor within the last 40Ma. Probes were designed and synthesized by Arbor  
219 Biosciences (Ann Arbor, Michigan) using myBaits technology; they also performed library preparation,  
220 target enrichment and oversaw sequencing of the resultant products. To avoid unfair bias, as different  
221 individuals were used for the Sanger-sequenced amplicons and genomic datasets, a different *D. rotundus*  
222 individual than the one used for the transcriptome was also sequenced here. DNA was extracted from  
223 liver tissue sampled from a bat obtained in La Selva, Costa Rica in 2014 (Permit: R-018-2013-OT-  
224 CONAGEBIO; IACUC: 2013-2034-R1-4.15.16-BAT) using the DNeasy Blood and Tissue Kit Protocol  
225 from Qiagen (69504). Target sequences captured by the probes were sequenced using Illumina  
226 sequencing technology following enrichment. Reads were first trimmed for quality using the same  
227 bbdduk.sh script from the transcriptome assembly and exact duplicate reads were removed using ParDRe  
228 v. 2.2.5. To assemble the reads into receptor contigs, a target from the probe design were used to map and  
229 align reads with HybPiper v.1.2 (Johnson *et al.* 2016) reads\_first.py pipeline with the “-bwa” option  
230 selected.

231 *Genome mapping and recovery sensitivity analyses:* Mapping to the same location in the genome was  
232 used to assess whether the same receptor was recovered in sequencing and assembly approaches. We  
233 mapped all identified olfactory receptors from RefSeq sequences to the *D. rotundus* genome using GMAP  
234 v. 2017-01-14 (Wu and Watanabe 2005). We first indexed the genome with gmap\_build using a kmer  
235 value of 12. We then identified the olfactory receptor coding sequences from the genome using the ORA  
236 pipeline, and mapped the identified genomic olfactory receptors back to the genome with GMAP. The

237 mapping yielded genomic scaffold coordinates of the olfactory receptors in the genome to be compared  
238 against the location of the receptors from other assembly methods. Only coordinates of genomic receptors  
239 that mapped with 100% identity were used. In contrast, Sanger-sequenced amplicons, transcriptome  
240 receptors, and receptors assembled from targeted sequence capture were mapped using GMAP, with  
241 settings for which there was at least 50% overlap with the receptor coordinates in the genome to account  
242 for partially assembled receptors to map. We allowed for mappings with 95% identity, as this was the  
243 average sequence nucleotide identity of post-duplication olfactory receptors within mammalian olfactory  
244 subfamilies (Hughes *et al.* 2018). Receptors sometimes mapped with different quality values, to multiple  
245 locations in the genome, or in a chimeric fashion, thus a threshold for true mappings was set. If a receptor  
246 mapped to multiple locations, the location with the highest sequence identity and mapping quality was  
247 used. Receptor mapping localities that intersected with those in the genome were determined using the  
248 “intersectBed” in bedtools v. 2.26.0 (Quinlan 2014).

249         We performed a sensitivity analysis to quantify the recovery of all assembled olfactory receptors.  
250 Some receptors recovered in each sequencing approach mapped to the genome, but to locations not yet  
251 annotated. Thus, there were more olfactory receptors discovered than were previously identified in the  
252 published genomic protein-coding sequences for *D. rotundus*. Any receptor from any method that mapped  
253 to the genome was considered a “true positive”. A receptor that was present in the genome, but not found  
254 in another method was considered a “false negative”. Specificity in this case should be interpreted with  
255 caution, as there is no variation between sequencing methods in the number of “true negatives”, *i.e.* any  
256 gene not identified as an olfactory receptor is not an olfactory receptor under this approach. Confidence  
257 intervals were calculated using 2000 bootstrap replicates of sensitivity. Sensitivity values were calculated  
258 using the “pROC” v. 1.1.0 package in R v. 3.3.2 Scripts for all assemblies and *post hoc* analyses are  
259 available on Dryad [XXXXXX].

## 260 **Results**

261 *RNA-Seq and transcriptome assembly*: Extracted RNA from the MOE sample resulted in 1.09 µg at 91  
262 ng/µL and an RNA integrity number (RIN) of 9.6 for *Desmodus rotundus*, enough quantity and quality

263 for library preparation. After trimming and removal of low-quality reads, the sample produced more than  
264 56 million total reads, with a median insert size of 330. The average read quality for the set of pairs  
265 indicated low error rate, with a mean quality score of  $39.6 \pm 1.3$  for the right and  $38.8 \pm 1.3$  for the left. As  
266 expected, different assembly methods within the Oyster River Protocol resulted in different numbers of  
267 genes, and ultimately 564 unique genes were identified across all assemblies. The pooled assembly  
268 consisted of 255,295 sequences, in which 49% of the contigs had an open reading frame and the mean  
269 contig length was 733 bp.

270 Both the transRate and BUSCO scores indicated a high-quality assembly. The optimal transRate  
271 score was 0.59 and the empirical score was 0.51. Over 91% of the reads were considered “good  
272 mappings” back to contigs, and only 1.3% of assembled contigs had no coverage. The lower transRate  
273 score was mostly affected by the 79% of contigs considered to have low coverage, defined by a mean per-  
274 base read coverage of less than 10, but this is to be expected for lowly expressed transcripts. The  
275 assembly also resulted in a BUSCO score of 82.1% complete (46.5% single copy, 35.6% duplicated),  
276 indicating that nearly all orthologs from the database matched to an ortholog within the assembly. Only  
277 8% of the ortholog database matched to transcripts considered to be fragmented and 9.9% of the database  
278 was missing.

279 *Olfactory receptor detection:* There were 424 intact ORs identified in the *D. rotundus* genome. The  
280 Sanger-sequenced amplicons made available to us from previously published work consisted of 132 intact  
281 olfactory receptor sequences (Hayden *et al.* 2014). From the transcriptome, 291 olfactory receptors were  
282 recovered and, of these, 267 had a “good” transRate score indicating high coverage and low rates of  
283 fragmentation for most of these genes. From targeted sequence capture, 424 intact olfactory receptors  
284 were also recovered, though despite the exact number as those found in the genome, not all of these  
285 receptors were detected in the genome and *vice versa* (see below).

286 *Olfactory receptor genome mapping:* By mapping intact olfactory receptors to the *D. rotundus* genome,  
287 we assessed whether the same olfactory receptor was assembled across different sequencing and assembly  
288 approaches. First, the olfactory receptor coding sequences identified from the genome were mapped back

289 onto the genome to obtain the location of each olfactory receptor. Of the 424 identified coding sequences,  
290 only 384 sequences mapped with 100% identity to the genome, indicating a discrepancy between the  
291 post-processing of the coding sequence identification (*e.g.* open reading frame editing) from the genome  
292 and the actual published genome (Fig. 2). Thus, because we could only be certain of 384 olfactory  
293 receptor locations, these receptor localities were used to match the receptors in the *de novo* sequencing  
294 data sets. Of these 384, 5% of the receptors mapped to multiple locations. Although the genome is not  
295 assembled into chromosomes, having the same scaffold index indicates receptors relatively close together.  
296 The distribution of mapped reads showed most receptors were clustered by subfamily on the same  
297 scaffold (Fig. 3). For the majority of subfamilies with multiple receptors, the distribution of these  
298 receptors was restricted to two or three scaffolds. Class I genes in particular, which are homologous with  
299 olfactory receptors across vertebrates, are mostly distributed along only two scaffolds.

300 The quality of mapping differed across sequencing approaches (Fig. 2). The Sanger-sequenced  
301 amplicons had the highest proportion of failed mapped receptors compared to any other approach (Fig. 2).  
302 Nearly 19% of the 132 amplicon olfactory receptors failed to map to the genome, compared to 11% of the  
303 transcriptome contigs and 6% of the targeted sequence capture. Targeted sequence capture had the highest  
304 proportion of uniquely mapped receptors, with nearly 84% of the receptors matching to a locality in the  
305 genome.

306 To determine if different approaches recovered the same receptor, we matched the index of each  
307 mapped receptor in each sequencing method to the index of the 384 genomic receptors with known  
308 locations (Fig. 4). We then removed sequences that failed to map, and receptors that redundantly mapped  
309 to the same position. Redundantly mapped receptors are distinct from a single receptor mapping to  
310 multiple locations. Instead, receptors deemed unique in each sequencing approach data set (perhaps due to  
311 a sequencing error) are considered the same receptor if they map to the same genomic location with up to  
312 95% sequence identity. We report the minimum number of receptors confidently identified in the genome  
313 that confidently match those in the *de novo* approaches. After filtering, 56 receptors from the genome  
314 matched a Sanger-sequenced amplicon (Fig. 4; 5). In other words, a recovery rate of 42% of the Sanger-

315 sequenced amplicons mapped to a receptor annotated in the genome. For the transcriptome, 53% of the  
316 genes were recovered and 73% of receptors were recovered for the targeted sequence capture (Fig. 4).  
317 Only 20 receptors of the 384 protein-coding genomic sequences were consistently recovered by the three  
318 approaches, spread across different *OR* subfamilies. The amplicon data has a clear underrepresentation of  
319 certain subfamilies, particularly in the Class I receptors (Fig. 4), while the transcriptome provides a more  
320 even representation survey of olfactory receptors in different subfamilies.

321 Some receptors recovered by the sequencing approaches mapped to the genome but did not map  
322 to the localities of the protein-coding genes identified from the genome (*i.e.*, the receptors mapped to  
323 unannotated locations in the genome). We still considered these “true” receptors since they exist in the  
324 genome. Figure 5 summarizes these receptors from other sequencing approaches that mapped but were  
325 not annotated in the genome. Three “true” receptors were found in the Sanger-sequenced amplicons,  
326 transcriptome, and targeted bait capture and six “true” receptors were found in the Sanger-sequenced  
327 amplicons and targeted bait capture but were not annotated in the genome (Fig. 5). There were five  
328 receptors from Sanger-sequenced amplicons, six receptors from the transcriptome, and 28 receptors from  
329 the targeted bait capture that mapped to the genome but were not recovered in any other sequence  
330 approach (Fig. 5).

331 We performed sensitivity analyses to quantify the assembly of receptors within the scope of all  
332 possible receptors that may be in the genome (Fig. 6). From the pool of all possible receptors determined  
333 from locations in which at least one receptor mapped from one of the sequencing approaches, a total of  
334 430 intact receptors were found in the genome. Sensitivity analyses represent the “true positive” results  
335 for each assembly approach. The highest sensitivity was for the protein-coding genomic sequences at 0.83  
336 (95% confidence intervals: 0.79, 0.87), followed by the targeted sequence capture at 0.77 (0.73, 0.81), the  
337 transcriptome at 0.45 (0.40, 0.50), the Sanger-sequenced amplicon receptors were the least sensitive at  
338 0.15 (0.12, 0.19) (Fig. 6).

339 **Discussion**

340 In this study, we compared three methods to recover high-quality sequences for multigene families in  
341 non-model species lacking reference genomes. We used olfactory receptors, the largest protein-coding  
342 gene family in the mammalian genome, to illustrate advantages and differences in sequencing and  
343 assembly approaches. By comparing to genomic sequencing data, we showed that targeted sequence  
344 capture is the most comprehensive method for recovering multigene sequences across different  
345 sequencing approaches, recovering up to 72% of the receptors annotated in the genome. High-coverage  
346 MOE specific transcriptomes can also recover a proportion (~48%) of olfactory receptors; however, we  
347 found that no method, including high-coverage, high-quality whole-genome sequencing, resulted in a  
348 complete inventory of olfactory receptors. We also found that amplicon-based approaches previously  
349 used to characterize olfactory receptor repertoires produced inventories that were both the least complete  
350 and the most biased in terms of olfactory subfamily representation.

351 Comparisons of the performance of sequencing and assembly for large gene families are rare,  
352 though a few studies have quantified variation in success rates outside of model organisms. A previous  
353 study of orchid bees, for example, identified chemosensory genes from *de novo* antennal transcriptomes  
354 and compared different assemblers in their ability to recover the maximum high quality chemosensory  
355 genes (Brand *et al.* 2015). This study found that Trinity (Grabherr *et al.* 2011) outperformed other  
356 assembly approaches, but intensive permutations of different Trinity parameters were required to recover  
357 the maximum number of unique receptors. Another study compared assembly and sequencing approaches  
358 of the major histocompatibility complex (MHC) class I-like (Ib) genes in voles (Migalska *et al.* 2016).  
359 This study compared *de novo* assemblies of all reads, *de novo* assemblies guided by the mouse reference  
360 genome, and assemblies of reads that only mapped to MHC-Ib loci in the mouse genome. In this analysis,  
361 genome-guided assemblies outperformed all other approaches, but there was extensive variation between  
362 individual samples. Some individuals yielded 38 MHC-Ib gene copies out of ~130 copies, while no  
363 contigs were detected in other samples. The authors also discovered high rates of chimeric sequences, and  
364 incorrect bases at loci even when coverage suggested otherwise, though this may be the result of the  
365 mouse reference genome diverging from the vole RNA-Seq reads. The authors found *de novo*



366 transcriptome data was not ideal for sequencing copies in a highly polymorphic gene family and found  
367 more success in designing primers from the transcript reads and sequencing amplicons using Sanger  
368 technology. Similarly, we found the probes designed from the transcriptomes recovered many more high-  
369 quality olfactory receptors than the sample obtained from the transcriptome (almost three quarters vs. half  
370 of the known intact receptors in the genome, Fig. 4).

371 Our study demonstrates that challenges for *de novo* sequencing and assembly of multigene  
372 families are not rooted in mis-assembled reads, but rather in the recovery of the complete inventory of  
373 genes within the gene family. Despite the incomplete and variable presence of receptors across methods,  
374 the majority of intact receptors assembled had high coverage and high transcriptome quality scores, with  
375 low rates of chimeric and failed mappings (Fig. 2). With sufficient read depth, then, transcriptome data of  
376 the main olfactory epithelium can reliably assemble highly similar olfactory receptors *de novo*,  
377 accounting for at least half of the intact receptors present in the genome. Targeted sequence capture  
378 provides even more comprehensive recovery of the true number of receptors (Fig. 2). It is clear, however,  
379 that in all approaches a significant proportion of the intact genomic receptors were missing, and in some  
380 cases more than half of the receptors were absent (Fig. 4). For the transcriptome, for example, only 53%  
381 of known olfactory receptors were expressed, though it is important to note that the entire receptor  
382 repertoire is not expected to be expressed at all times. For example, a previous study of human olfactory  
383 epithelium transcriptome discovered 88.6% of intact olfactory receptors were expressed, though these  
384 data were pooled across multiple individuals (Olender *et al.* 2016). A study in mice showed 94% of the  
385 olfactory receptors were expressed in mice, but these too were pooled across multiple individuals (Ibarra-  
386 Soria *et al.* 2014). The study also noted that aside from a handful of receptors, most receptors were  
387 expressed at very low abundance, and a receptor was considered “expressed” even if only a single  
388 fragment of the known gene was present in the transcriptome. Hence, the stringent criteria we used for  
389 considering an olfactory receptor expressed likely underestimates the number of receptors in the  
390 transcriptomes. At the same time, the great proportion of receptors with mapped locations in the genome



391 provides greater confidence in future *de novo* transcriptome applications for species lacking a sequenced  
392 genome.

393 Another objective of this study was to assess the performance of transcriptomes assembly  
394 methods in characterizing the olfactory receptor repertoire. One advantage of our approach was the  
395 application of the Oyster River Protocol, in which multiple assembly approaches were implemented,  
396 pooled, and then filtered for quality across approaches (MacManes 2018). This consideration is  
397 particularly important for large gene families with highly repetitive sequences. For example, a previous  
398 analysis of the transcriptome of orchid bee olfactory receptors demonstrated that different assemblers and  
399 different parameters within each assembler recovered different receptors, and ultimately the study  
400 combined receptors from up to nine different assemblies (Brand *et al.* 2015). We found hundreds of  
401 olfactory receptor sequences in each assembly, though only ~15% of annotated olfactory receptors had a  
402 sufficiently long reading frame to be considered an intact olfactory receptor. Many olfactory receptor  
403 sequences discarded from this analysis may have had coverage too low to provide a sufficiently long  
404 sequence, or the transcript itself may have been degraded, especially given the tropical field conditions  
405 under which the tissue was obtained (though the RIN value suggests otherwise). It is also possible that  
406 many of these discarded and truncated olfactory receptors are expressed pseudogenes, as the number of  
407 pseudogenized olfactory receptors is often just as diverse as the number of functional olfactory receptors  
408 (Niimura 2012). Olfactory receptor pseudogenes do get transcribed (Flegel *et al.* 2013; Verbeurgt *et al.*  
409 2014; Olender *et al.* 2016), and it has been recently shown that these expressed pseudogenes may actually  
410 be functional (Prieto-Godino *et al.* 2016). Though outside the scope of this study, it will be worthwhile to  
411 take a closer look at the patterns of pseudogene expression in these data sets.

412 Some receptors were present in some assemblies, but not in others (Fig. 4; 5). Even though we  
413 described 424 receptors from the protein-coding sequences of the genome, only 384 perfectly mapped  
414 back to the genome. This may be due to subsequent annotation methods of the raw genome assembly  
415 during detection of protein-coding sequences. The common vampire bat genome was sequenced from two  
416 individuals (Zepeda Mendoza *et al.* 2018), and thus some of the variation may have collapsed in post-

417 processing. Some degree of variation in copy number of certain receptors between individuals is  
418 expected. Olfactory receptors are highly polymorphic in both sequence (Mainland *et al.* 2014), and the  
419 number of receptors present in an individual genome (Hasin *et al.* 2008; Young *et al.* 2008). In humans,  
420 an average of eleven copy number variants occur across individuals (Nozawa *et al.* 2007), and these  
421 values tend to be higher in olfactory receptor pseudogenes (Nozawa *et al.* 2007; Hasin *et al.* 2008; Young  
422 *et al.* 2008). Some loci may be functional in some individuals, but pseudogenized in others (Gilad and  
423 Lancet 2003; Menashe *et al.* 2003; MacArthur *et al.* 2012). In our study, each sequencing approach was  
424 derived from a different individual sampled from quite different localities, which may contribute to the  
425 variation observed across methods. Besides this biological variation, low coverage of some receptors  
426 probably caused differences among assemblies. From visual inspection, reads from transcripts found in  
427 multiple assemblies were often uniquely mapped, and the corresponding transcripts had an order of  
428 magnitude higher coverage of perfectly matched reads than receptors that were either chimeric or mapped  
429 to multiple loci. The low coverage of the latter receptors may have led to the incorporation of wrong reads  
430 into the assembly and resulted in chimeras, or the reads may have been too few to sufficiently recover the  
431 contig under a different assembly condition

432 Olfactory receptors recovered from Sanger sequencing of amplicons from degenerate primers  
433 performed poorly relative to other methods (Fig. 4, 5). The amplicon data exhibited the highest failure  
434 rate of receptors mapped to the genome and highest rate of receptors mapping to multiple loci (Fig. 2).  
435 While poor genome assembly in these repetitive regions may in part cause mapping failures, there are  
436 several potential explanations for the low rates of mapping in the Sanger-sequenced amplicons, despite  
437 the low error rates of Sanger sequencing. The amplicon data obtained from a previously published  
438 analysis was obtained by cloning olfactory receptors amplified using two sets of degenerate primers, one  
439 set for Class I genes and another for Class II genes (Hayden *et al.* 2014). The study implemented a  
440 statistical “mark-recapture” analysis to determine the probability that all olfactory receptors were  
441 amplified, and set the threshold for the ratio of observed olfactory receptors to expected numbers to 25%  
442 (Hayden *et al.* 2010, 2014). Thus, many of the published repertoires were underrepresented. One issue

443 with the amplicon data is the low representation, particularly in the Class I subfamily. The low diversity  
444 may be due to degenerate primer bias or clone selection bias, and this is portrayed in the clustered nature  
445 of the amplicon profile in Figure 4. Targeted sequencing through primer design of multigene families has  
446 been relatively successful (Hohenbrink *et al.* 2013, 2014; Larsen *et al.* 2014; Yoder *et al.* 2014; Migalska  
447 *et al.* 2016), but these studies often used dozens of primer pairs. It may be that two primer sets for  
448 mammalian olfactory receptors that can span over 1,000 genes is insufficient for complete representation.  
449 Amplicon-based olfactory receptor analyses can be a good introductory point to documenting the  
450 diversity of mammalian olfactory receptors, however, it appears caution should be used when interpreting  
451 these results in the context of comparative analyses of repertoire sizes across mammalian olfactory  
452 receptors.

453 Our study reveals strengths and weaknesses of different sequencing approaches for multigene  
454 families in terms of completeness of the representation of each gene in the family. However, depending  
455 on circumstances such as tissue availability, computing resources, and time, other factors are relevant for  
456 consideration. For example, while Sanger-sequencing amplicons had the most incomplete representation,  
457 Sanger sequencing has very low base calling error rates relative to high-throughput methods, does not  
458 require unfeasible computing time, and uses genomic DNA that does not have to be extracted from  
459 pristinely-preserved tissue as input. At the same time, while the genome is a more complete inventory, the  
460 costs and resources required by Dovetail genome sequencing are beyond the capacity of many labs, and it  
461 requires freshly frozen tissue, which may be unfeasible for most species. Transcriptomes are useful for  
462 characterizing the expressed receptors, but also require freshly dissected epithelial tissue for RNA, which  
463 may not be scalable across many species. While targeted sequence capture does require high-throughput  
464 sequence data for probe design, these data can come from a subset of species or individuals. Once the  
465 probes are designed, experiments only require genomic tissue and can be feasibly scalable across many  
466 species or individuals. Aside from the genome, targeted sequence capture recovered a substantial  
467 proportion of intact receptors and offers a promising avenue for large-scale multigene family analyses.  
468 Looking ahead, as long-read sequencing becomes more tractable, this technology may also have a strong

469 influence on sequencing multigene families that are often tandem-duplicated in the same genomic region  
470 (Nam *et al.* 2019).

471         Our results have several implications for studies of gene family evolution and understanding  
472 olfactory receptor diversity. First, gene family evolution is frequently analyzed through birth-death  
473 process, in which phylogeny-based models are applied to species and/or gene trees to understand when in  
474 the evolutionary history of a group losses and duplications occurred (Hahn *et al.* 2007; Niimura and Nei  
475 2007; Han *et al.* 2009; Zhao *et al.* 2015). These models rely on the assumption that all copies of the gene  
476 families are known in extant species. However, although there are more than 300 intact olfactory  
477 receptors in the vampire bat genome, we have shown that both the transcriptomes and the amplicon data  
478 represent a severe underestimation of the total number of olfactory receptor genes with open reading  
479 frames in the genome. Understanding the variance between sequencing methodologies is indispensable to  
480 avoid false conclusions when studying gene family evolution. If the transcriptomic data or the amplicon  
481 sequences were used in analyses with genomic olfactory receptor data from other mammals, gene losses  
482 in the common vampire bat may be inferred, when the apparent loss is actually due to the failure to  
483 sequence the entire intact olfactory repertoire. Therefore, we recommend using genome-based sequence  
484 data or sequence capture data instead of transcriptome or amplicon data for studies of birth-death  
485 evolution that require estimating the presence and absence of a receptor, as well as for any large gene  
486 family.

487         While the *de novo* transcriptome sequencing of multigene families may be incomplete and  
488 inappropriate for birth-death modeling, the sequence data are reliably assembled and can be used in other  
489 informative ways. For example, orthologous sequences from other mammals can be identified from these  
490 sequences and the strength of selection on particular receptors across species can subsequently be  
491 quantified. Receptors recovered from the transcriptome can also serve as excellent starting material for  
492 probe and primer design, as with our sequence capture data set. Thus, understanding the caveats and  
493 strengths of different sequencing and assembly approaches, analyses molecular sequence data of  
494 multigene family can be properly performed. Multigene families often compose significant proportions of

495 the genome of organisms, and often underlie mechanisms involved in immunity, metabolism, and sensory  
496 perception. Thus, it is crucial to understand whether variation in multigene families is derived from  
497 methodological shortcomings or whether it is biologically relevant.

#### 498 **Acknowledgements**

499 This project was funded by the National Science Foundation (NSF) Graduate Research Fellowship to  
500 LRY, NSF-DEB 1442142 to LMD and SJR, NSF-DEB 1442314 to KES, and NSF-DEB 1442278 to  
501 ERD. Additionally, this work was supported by the European Research Council (ERC Starting grant  
502 310482 [EVOGENO]) awarded to SJR, and KTJD was funded in part by an LSI ECR bridging fund. The  
503 Indiana University Carbonate server funded by NSF-DBI 1458641 provided the computational resources  
504 for the transcriptome assemblies. Support for fieldwork was provided by the American Museum of  
505 Natural History Taxonomic Mammalogy Fund. Thank you to M. Lisandra Zepeda Mendoza, Tom  
506 Gilbert, and other members of the vampire bat genome sequencing team for making the data available to  
507 us ahead of publication.

508 **References**

- 509 Brand P., S. R. Ramírez, F. Leese, J. J. G. Quezada-Euan, R. Tollrian, *et al.*, 2015 Rapid evolution of  
510 chemosensory receptor genes in a pair of sibling species of orchid bees (Apidae: Euglossini). BMC  
511 Evol. Biol. 15: 176. <https://doi.org/10.1186/s12862-015-0451-9>
- 512 Brechbühl J., G. Luyet, F. Moine, I. Rodriguez, and M.-C. Broillet, 2011 Imaging pheromone sensing in a  
513 mouse vomeronasal acute tissue slice preparation. J. Vis. Exp. e3311.  
514 <https://doi.org/doi:10.3791/3311>
- 515 Eddy S., 2010 HMMER3: a new generation of sequence homology search software
- 516 Emms D. M., and S. Kelly, 2015 OrthoFinder: solving fundamental biases in whole genome comparisons  
517 dramatically improves orthogroup inference accuracy. Genome Biol. 16: 1–14.  
518 <https://doi.org/10.1186/s13059-015-0721-2>
- 519 Flegel C., S. Manteniotis, S. Osthold, H. Hatt, and G. Gisselmann, 2013 Expression profile of ectopic  
520 olfactory receptors determined by deep sequencing. PLoS One 8.  
521 <https://doi.org/10.1371/journal.pone.0055368>
- 522 Gilad Y., and D. Lancet, 2003 Population differences in the human functional olfactory repertoire. Mol.  
523 Biol. Evol. 20: 307–314. <https://doi.org/10.1093/molbev/msg013>
- 524 Grabherr M. G., B. J. Haas, M. Yassour, J. Z. Levin, D. A. Thompson, *et al.*, 2011 Full-length  
525 transcriptome assembly from RNA-Seq data without a reference genome. Nat. Biotechnol. 29: 644–  
526 52. <https://doi.org/10.1038/nbt.1883>
- 527 Gracheva E. O., J. F. Cordero-Morales, J. A. González-Carcacía, N. T. Ingolia, C. Manno, *et al.*, 2011  
528 Ganglion-specific splicing of *TRPVI* underlies infrared sensation in vampire bats. Nature 476: 88–  
529 91. <https://doi.org/10.1038/nature10245>
- 530 Hahn M. W., J. P. Demuth, and S. Han, 2007 Accelerated rate of gene gain and loss in primates. Genetics  
531 177: 1941–1949. <https://doi.org/10.1534/genetics.107.080077>
- 532 Han M. V., J. P. Demuth, C. L. McGrath, C. Casola, and M. W. Hahn, 2009 Adaptive evolution of young  
533 duplicated genes in mammals. Genome Res. 19: 859–867. <https://doi.org/10.1101/gr.085951.108>

- 534 Hasin Y., T. Olender, M. Khen, C. Gonzaga-Jauregui, P. M. Kim, *et al.*, 2008 High-resolution copy-  
535 number variation map reflects human olfactory receptor diversity and evolution. *PLoS Genet.* 4.  
536 <https://doi.org/10.1371/journal.pgen.1000249>
- 537 Hayden S., M. Bekaert, T. A. Crider, S. Mariani, W. J. Murphy, *et al.*, 2010 Ecological adaptation  
538 determines functional mammalian olfactory subgenomes. *Genome Res.* 20: 1–9.  
539 <https://doi.org/10.1101/gr.099416.109>
- 540 Hayden S., M. Bekaert, A. Goodbla, W. J. Murphy, L. M. Dávalos, *et al.*, 2014 A cluster of olfactory  
541 receptor genes linked to frugivory in bats. *Mol. Biol. Evol.* 31: 917–27.  
542 <https://doi.org/10.1093/molbev/msu043>
- 543 Hohenbrink P., N. I. Mundy, E. Zimmermann, and U. Radespiel, 2013 First evidence for functional  
544 vomeronasal 2 receptor genes in primates. *Biol. Lett.* 9.
- 545 Hohenbrink P., S. Dempewolf, E. Zimmermann, N. I. Mundy, and U. Radespiel, 2014 Functional  
546 promiscuity in a mammalian chemosensory system: extensive expression of vomeronasal receptors  
547 in the main olfactory epithelium of mouse lemurs. *Front. Neuroanat.* 8: 1–10.  
548 <https://doi.org/10.3389/fnana.2014.00102>
- 549 Holding M. L., M. J. Margres, A. J. Mason, C. L. Parkinson, and D. R. Rokyta, 2018 Evaluating the  
550 performance of *de novo* assembly methods for venom-gland transcriptomics. *Toxins (Basel)*. 10: 1–  
551 21. <https://doi.org/10.3390/toxins10060249>
- 552 Hong W., and H. Zhao, 2014 Vampire bats exhibit evolutionary reduction of bitter taste receptor genes  
553 common to other bats. *Proc. Biol. Sci.* 281: 20141079. <https://doi.org/10.1098/rspb.2014.1079>
- 554 Hughes G. M., L. Gang, W. J. Murphy, D. G. Higgins, and E. C. Teeling, 2013 Using Illumina next  
555 generation sequencing technologies to sequence multigene families in *de novo* species. *Mol. Ecol.*  
556 *Resour.* 13: 510–21. <https://doi.org/10.1111/1755-0998.12087>
- 557 Hughes G. M., E. S. M. Boston, J. A. Finarelli, W. J. Murphy, D. G. Higgins, *et al.*, 2018 The birth and  
558 death of olfactory receptor gene families in mammalian niche adaptation. *Mol. Biol. Evol.* 35:  
559 1390–1406. <https://doi.org/10.1093/molbev/msy028>

- 560 Ibarra-Soria X., M. O. Levitin, L. R. Saraiva, and D. W. Logan, 2014 The olfactory transcriptomes of  
561 mice. *PLoS Genet.* 10: e1004593. <https://doi.org/10.1371/journal.pgen.1004593>
- 562 Johnson M. G., E. M. Gardner, Y. Liu, R. Medina, B. Goffinet, *et al.*, 2016 HybPiper: Extracting coding  
563 sequence and introns for phylogenetics from high-throughput sequencing reads using target  
564 enrichment. *Appl. Plant Sci.* 4: 1600016. <https://doi.org/10.3732/apps.1600016>
- 565 Kanageswaran N., M. Demond, M. Nagel, S. Benjamin, P. Schreiner, *et al.*, 2015 Deep sequencing of the  
566 murine olfactory receptor neuron transcriptome. *PLoS One* 10: e0113170.  
567 <https://doi.org/10.1371/journal.pone.0113170>
- 568 Larsen P. a, A. M. Heilman, and A. D. Yoder, 2014 The utility of PacBio circular consensus sequencing  
569 for characterizing complex gene families in non-model organisms. *BMC Genomics* 15: 720.  
570 <https://doi.org/10.1186/1471-2164-15-720>
- 571 Logan D. W., 2014 Do you smell what I smell? Genetic variation in olfactory perception. *Biochem. Soc.*  
572 *Trans.* 42: 861–5. <https://doi.org/10.1042/BST20140052>
- 573 MacArthur D. G., S. Balasubramanian, A. Frankish, N. Huang, J. Morris, *et al.*, 2012 A systematic survey  
574 of loss-of-function variants in human protein-coding genes. *Science* 335: 823–8.  
575 <https://doi.org/10.1126/science.1215040>
- 576 MacManes M. D., 2018 The Oyster River Protocol: a multi-assembler and kmer approach for de novo  
577 transcriptome assembly. *PeerJ* 6: e5428. <https://doi.org/10.1109/ECTC.2009.5074081>
- 578 MacRander J., M. Broe, and M. Daly, 2015 Multi-copy venom genes hidden in *de novo* transcriptome  
579 assemblies, a cautionary tale with the snakelocks sea anemone *Anemonia sulcata* (Pennant, 1977).  
580 *Toxicon* 108: 184–188. <https://doi.org/10.1016/j.toxicon.2015.09.038>
- 581 Mainland J. D., A. Keller, Y. R. Li, T. Zhou, C. Trimmer, *et al.*, 2014 The missense of smell: functional  
582 variability in the human odorant receptor repertoire. *Nat. Neurosci.* 17: 114–20.  
583 <https://doi.org/10.1038/nn.3598>
- 584 Menashe I., O. Man, D. Lancet, and Y. Gilad, 2003 Different noses for different people. *Nat. Genet.* 34:  
585 143–4. <https://doi.org/10.1038/ng1160>



- 586 Migalska M., A. Sebastian, M. Konczal, P. Kotlik, and J. Radwan, 2016 De novo transcriptome assembly  
587 facilitates characterisation of fast-evolving gene families, MHC class I in the bank vole (*Myodes*  
588 *glareolus*). *Heredity* (Edinb). 118: 348–357. <https://doi.org/10.1038/hdy.2016.105>
- 589 Nam S., K. Hoff, O. K. Tørresen, A. T. Klunderud, and S. Jentoft, 2019 Long-read sequence capture of  
590 the haemoglobin gene clusters across codfish species. *Mol. Ecol. Resour.* 19: 245–259.  
591 <https://doi.org/10.1111/1755-0998.12955>
- 592 Nei M., and A. P. Rooney, 2005 Concerted and birth-and-death evolution of multigene families. *Annu.*  
593 *Rev. Genet.* 39: 121–152. <https://doi.org/10.1146/annurev.genet.39.073003.112240>
- 594 Niimura Y., and M. Nei, 2007 Extensive gains and losses of olfactory receptor genes in mammalian  
595 evolution. *PLoS One* 2. <https://doi.org/10.1371/journal.pone.0000708>
- 596 Niimura Y., 2012 Olfactory receptor multigene family in vertebrates: from the viewpoint of evolutionary  
597 genomics. *Curr. Genomics* 13: 103–14. <https://doi.org/10.2174/138920212799860706>
- 598 Niimura Y., A. Matsui, and K. Touhara, 2014 Extreme expansion of the olfactory receptor gene repertoire  
599 in African elephants and evolutionary dynamics of orthologous gene groups in 13 placental  
600 mammals. *Genome Res.* 24: 1485–1496. <https://doi.org/10.1101/gr.169532.113>
- 601 Nozawa M., Y. Kawahara, and M. Nei, 2007 Genomic drift and copy number variation of sensory  
602 receptor genes in humans. *Proc. Natl. Acad. Sci. U. S. A.* 104: 20421–20426.  
603 <https://doi.org/10.1073/pnas.0709956104>
- 604 Olender T., I. Keydar, J. M. Pinto, P. Tatarsky, A. Alkelai, *et al.*, 2016 The human olfactory  
605 transcriptome. *BMC Genomics* 1–18. <https://doi.org/10.1186/s12864-016-2960-3>
- 606 Prieto-Godino L. L., R. Rytz, B. Bargeton, L. Abuin, J. R. Arguello, *et al.*, 2016 Olfactory receptor  
607 pseudo-pseudogenes. *Nature* 539: 93–97. <https://doi.org/10.1038/nature19824>
- 608 Quinlan A. R., 2014 BEDTools: the Swiss-army tool for genome feature analysis. *Curr. Protoc.*  
609 *Bioinforma.* 11–12.
- 610 Shi W., J. Peifeng, and F. Zhao, 2017 The combination of direct and paired link graphs can boost  
611 repetitive genome assembly. *Nucleic Acids Res.* 45: 1–15. <https://doi.org/10.1093/nar/gkw1002>

- 612 Shiao M. S., A. Y. F. Chang, B. Y. Liao, Y. H. Ching, M. Y. J. Lu, *et al.*, 2012 Transcriptomes of mouse  
613 olfactory epithelium reveal sexual differences in odorant detection. *Genome Biol. Evol.* 4: 703–712.  
614 <https://doi.org/10.1093/gbe/evs039>
- 615 Sims D., I. Sudbery, N. E. Illott, A. Heger, and C. P. Ponting, 2014 Sequencing depth and coverage: key  
616 considerations in genomic analyses. *Nat. Rev. Genet.* 15: 121–32. <https://doi.org/10.1038/nrg3642>
- 617 Smith-Unna R., C. Boursnell, R. Patro, J. M. Hibberd, and S. Kelly, 2016 TransRate: Reference-free  
618 quality assessment of *de novo* transcriptome assemblies. *Genome Res.* 26: 1134–1144.  
619 <https://doi.org/10.1101/gr.196469.115>
- 620 Treangen T. J., and S. L. Salzberg, 2012 Repetitive DNA and next-generation sequencing: computational  
621 challenges and solutions. *Nat. Rev. Genet.* 46: 36–46. <https://doi.org/10.1038/nrg3164>
- 622 Verbeurgt C., F. Wilkin, M. Tarabichi, F. Gregoire, J. E. Dumont, *et al.*, 2014 Profiling of olfactory  
623 receptor gene expression in whole human olfactory mucosa. *PLoS One* 9: 21–26.  
624 <https://doi.org/10.1371/journal.pone.0096333>
- 625 Vijay N., J. W. Poelstra, A. Künstner, and J. B. W. Wolf, 2013 Challenges and strategies in transcriptome  
626 assembly and differential gene expression quantification. A comprehensive *in silico* assessment of  
627 RNA-seq experiments. *Mol. Ecol.* 22: 620–34. <https://doi.org/10.1111/mec.12014>
- 628 Waterhouse R. M., M. Seppey, F. A. Simão, M. Manni, P. Ioannidis, *et al.*, 2017 BUSCO applications  
629 from quality assessments to gene prediction and phylogenomics. *Mol. Biol. Evol.* 35: 543–548.
- 630 Wu T. D., and C. K. Watanabe, 2005 GMAP: A genomic mapping and alignment program for mRNA and  
631 EST sequences. *Bioinformatics* 21: 1859–1875. <https://doi.org/10.1093/bioinformatics/bti310>
- 632 Yoder A. D., L. M. Chan, M. dos Reis, P. A. Larsen, C. R. Campbell, *et al.*, 2014 Molecular evolutionary  
633 characterization of a V1R subfamily unique to strepsirrhine primates. *Genome Biol. Evol.* 6: 213–  
634 227. <https://doi.org/10.1093/gbe/evu006>
- 635 Yohe L. R., L. Liu, L. M. Dávalos, and D. A. Liberles, 2019 Protocols for the Molecular Evolutionary  
636 Analysis of Membrane Protein Gene Duplicates, pp. 49–62 in *Computational Methods in Protein*  
637 *Evolution*, edited by Sikosek T. Springer New York, New York, NY.

- 638 Yoon S., Z. Xuan, V. Makarov, K. Ye, and J. Sebat, 2009 Sensitive and accurate detection of copy  
639 number variants using read depth of coverage. *Genome Res.* 19: 1586–1592.  
640 <https://doi.org/10.1101/gr.092981.109>
- 641 Young J. M., R. M. Endicott, S. S. Parghi, M. Walker, J. M. Kidd, *et al.*, 2008 Extensive copy-number  
642 variation of the human olfactory receptor gene family. *Am. J. Hum. Genet.* 83: 228–242.  
643 <https://doi.org/10.1016/j.ajhg.2008.07.005>.
- 644 Zepeda Mendoza M., Z. Xiong, M. Escalera-Zamudio, A. Kathrine Runge, J. Thézé, *et al.*, 2018  
645 Hologenomic adaptations underlying the evolution of sanguivory in the common vampire bat. *Nat.*  
646 *Ecol. Evol.* 2: 659–668. <https://doi.org/10.1038/s41559-018-0476-8>
- 647 Zhao J., A. I. Teufel, D. A. Liberles, and L. Liu, 2015 A generalized birth and death process for modeling  
648 the fates of gene duplication. *BMC Evol. Biol.* 15: 275. <https://doi.org/10.1186/s12862-015-0539-2>  
649

650 **Figure Legends**

651 **Figure 1.** Sequencing and assembly approaches compared in this study. Sequencing approaches in red  
652 were mapped to the olfactory receptors found in the genome (black), and the proportion of receptors  
653 recovered from each approach were compared. The Sanger-sequenced amplicons were derived from  
654 published vampire bat olfactory receptors sequenced and amplified from degenerate primers (Hayden *et*  
655 *al.* 2014). Targeted sequence capture genes were sequenced using probes from *de novo* transcriptome  
656 assemblies. We show the expected length of olfactory receptor sequence recovered from each method and  
657 outline some pros (+) and cons (-) of each approach.

658 **Figure 2.** Number of receptors mapped using GMAP v. 2017-01-14 (Wu and Watanabe 2005) to the  
659 vampire bat genome (Zepeda Mendoza *et al.* 2018) for each sequencing and assembly approach, showing  
660 receptors mapped to unique positions in the genome, receptors mapped to more than one position, and  
661 receptors that failed to map (less than 95% sequence identity).

662 **Figure 3.** Number of olfactory receptors found by scaffold of the vampire bat genome, color-coded by  
663 olfactory receptor subfamily. Only scaffold indices that contained one or more olfactory receptors are  
664 shown.

665 **Figure 4.** Tile plot of olfactory receptors recovered from each sequencing approach relative to receptors  
666 present in the genome, grouped by olfactory receptor subfamily. Each row indicates a single olfactory  
667 gene identified in the genome. Empty boxes denote no olfactory receptor recovered in that sequencing or  
668 assembly approach mapped to the same location as the olfactory receptor from the genome.

669 **Figure 5.** Venn diagram of the number of intact receptors recovered from each method that were also  
670 recovered in an alternative sequencing approach.

671 **Figure 6.** Quantification of the sensitivity for each sequencing approach of the recovery of the number of  
672 potential intact olfactory receptors. Any receptor from any method that mapped to the genome was  
673 considered a “true positive”. A receptor that was present in the genome, but not found in another method  
674 was considered a “false negative”.

# **SANGER**

with degenerate primers

~750bp

- +lowest base calling error rates
- primer bias
- cloning bias

# **GENOME**

~900bp

- + high coverage with Dovetail
- + annotated open reading frames
- composite of two individuals

# **SEQUENCE CAPTURE**

~900bp

- +discernible, yet flexible specificity
- dependent on probe design

# **TRANSCRIPTOME**

~900bp

- + subset of genome
- + independent of probe design
- expression bias

**# intact olfactory receptors**

400  
300  
200  
100  
0

genome

Sanger

transcriptome

bait capture

unique  
mutiple  
failed

**Assembly**

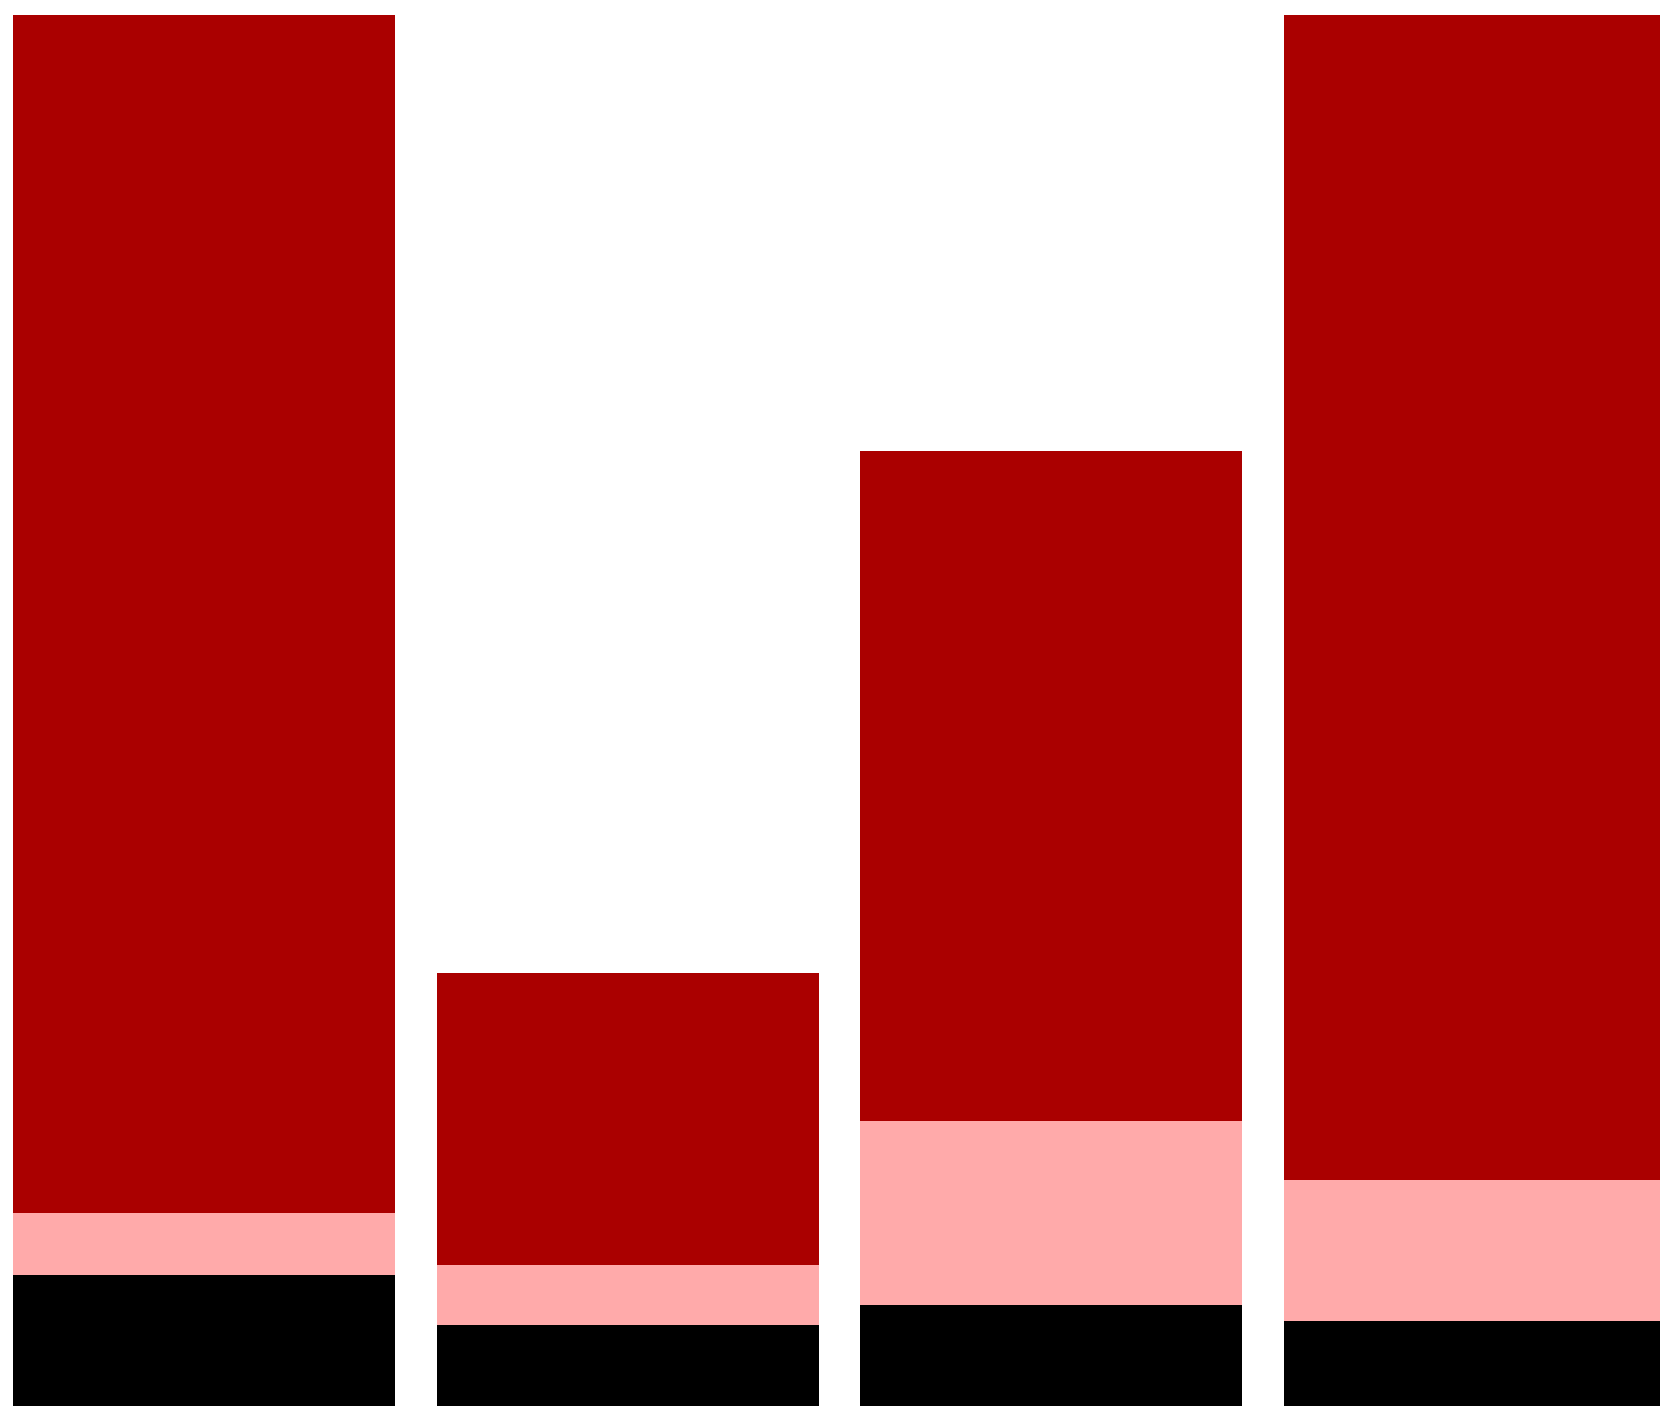

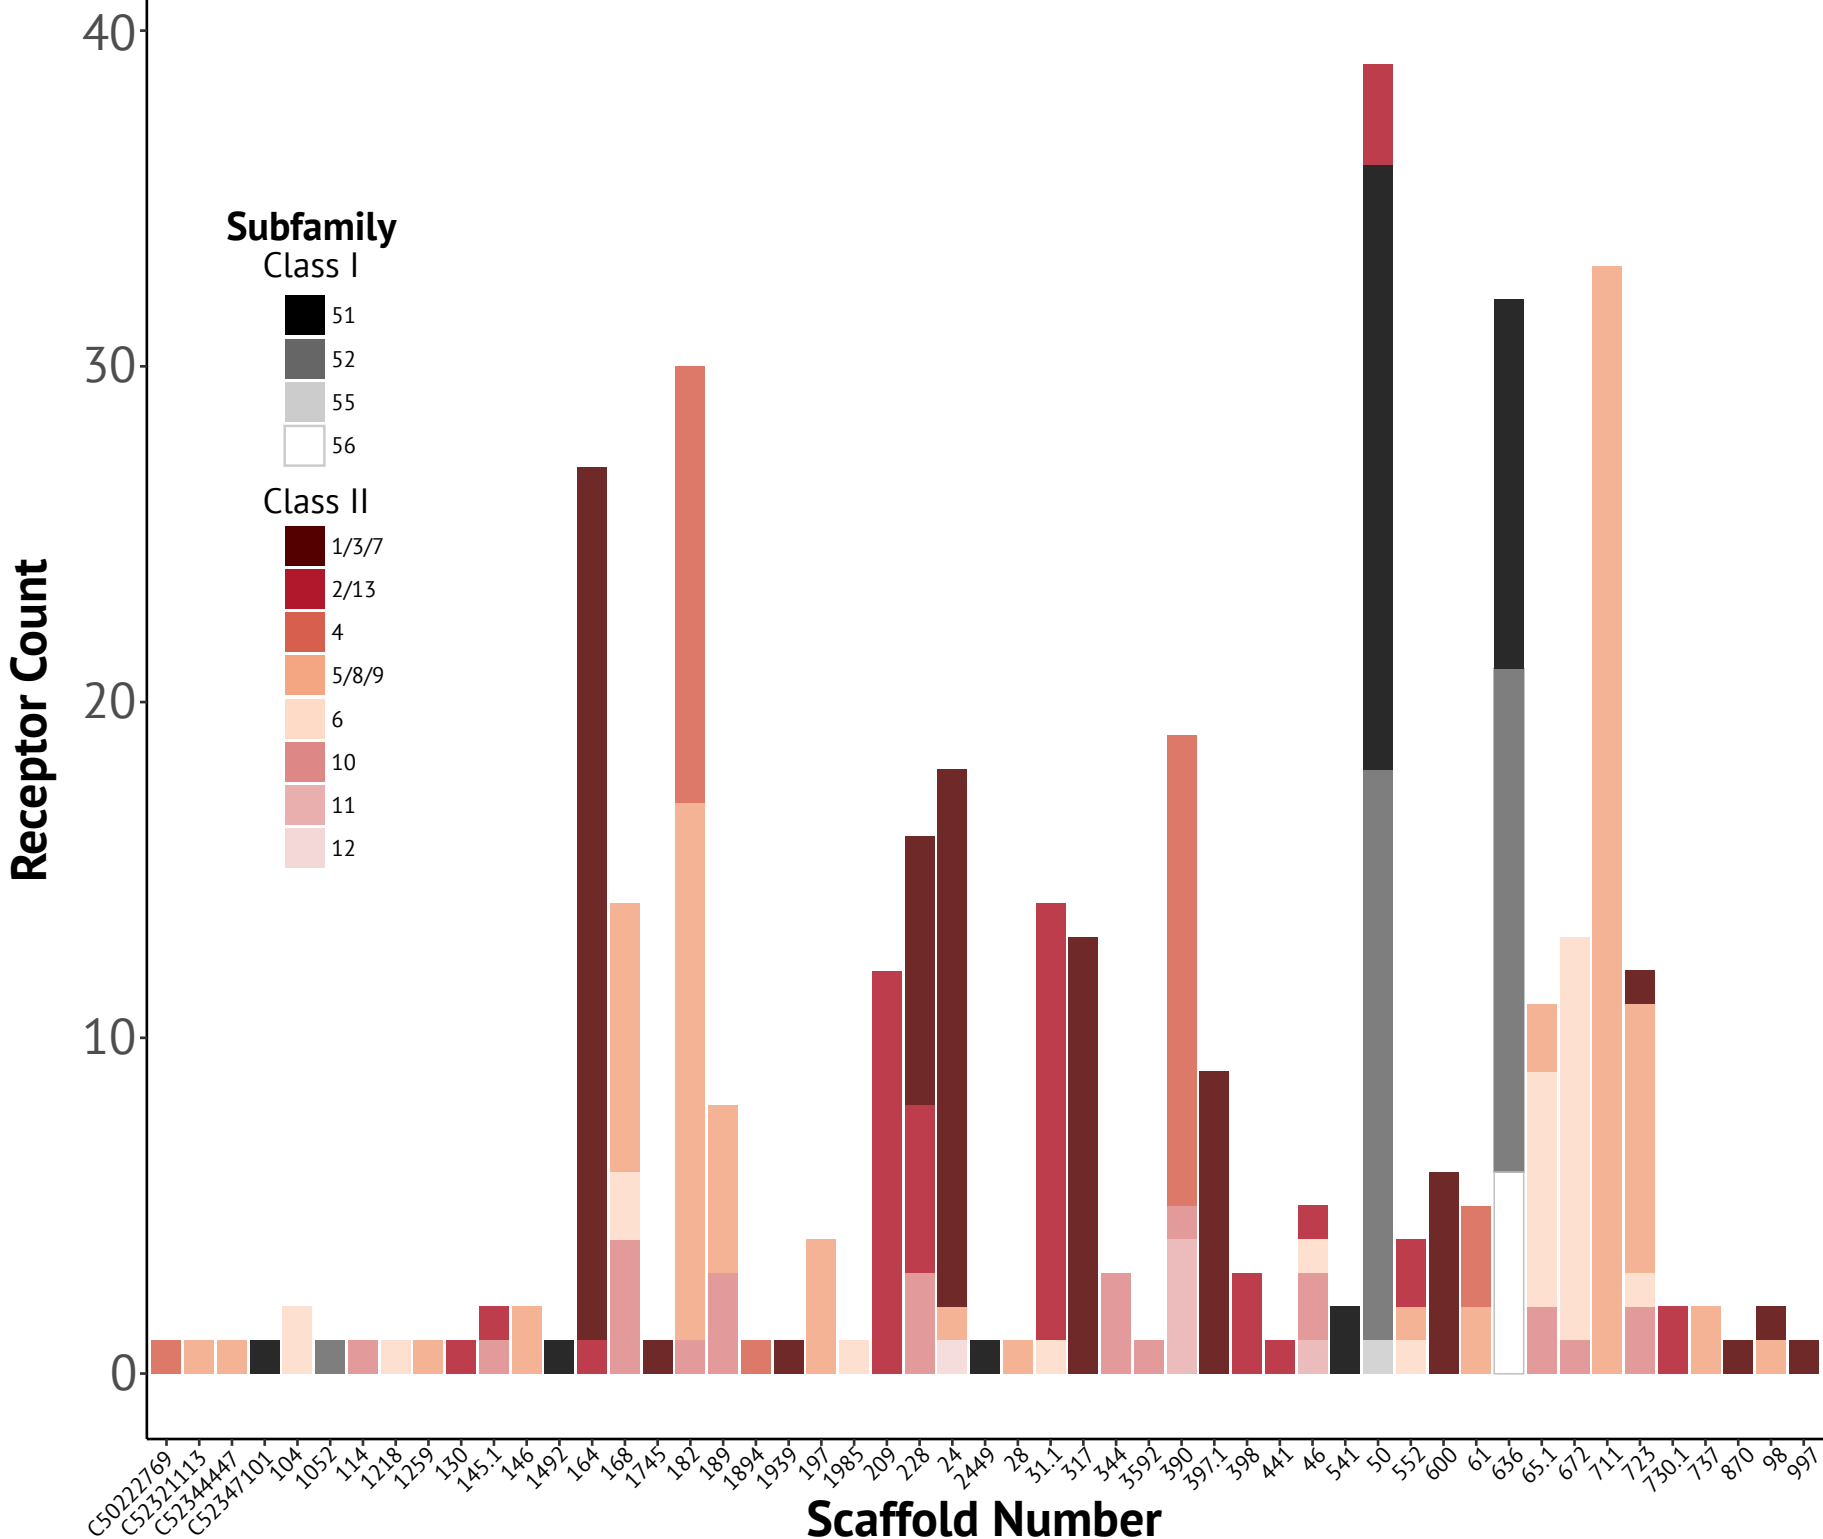

**OR Subfamily**

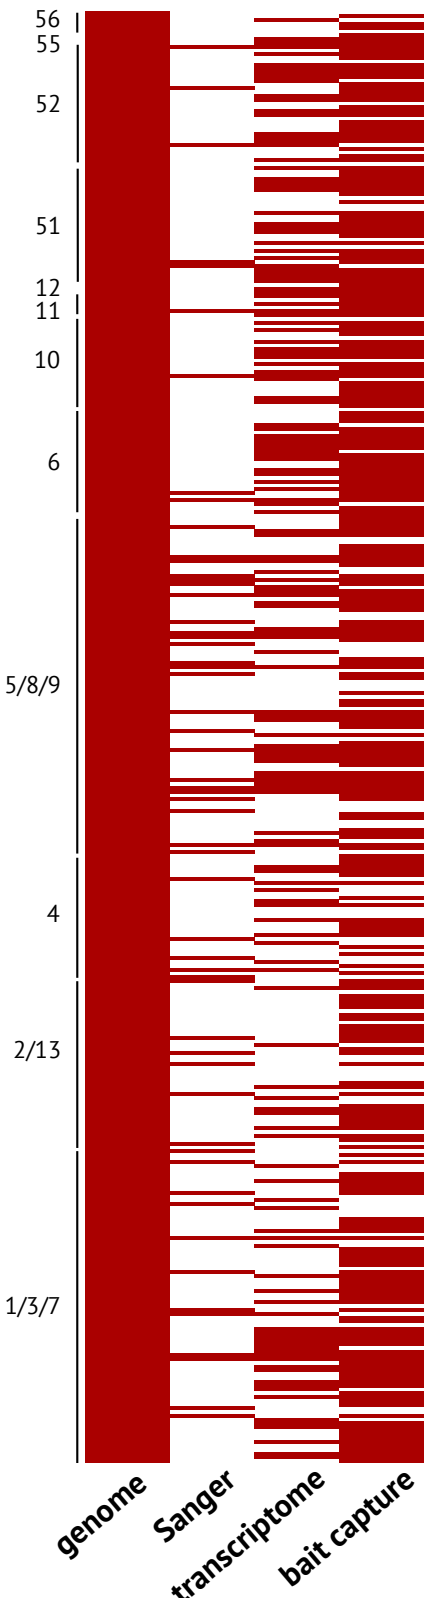

**Class I**

**Class II**



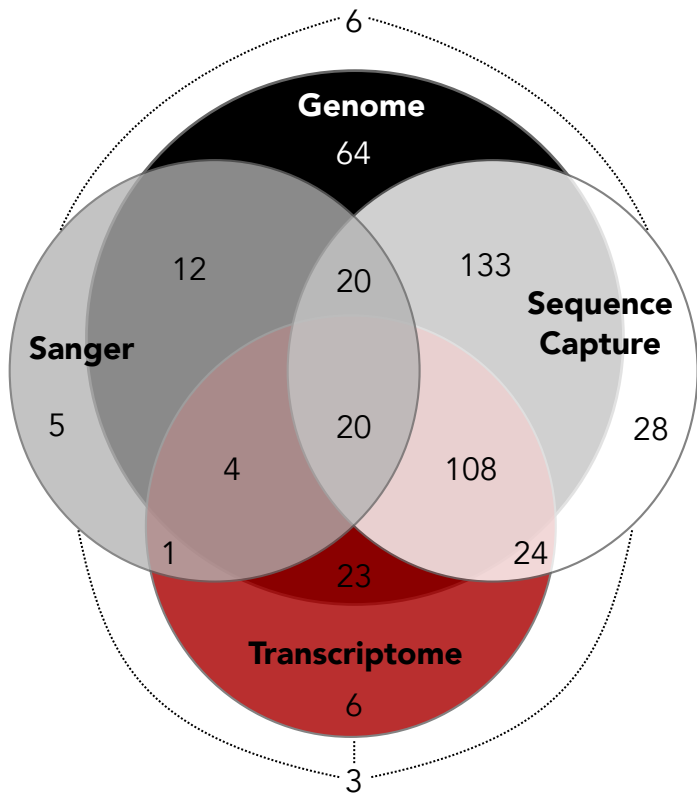

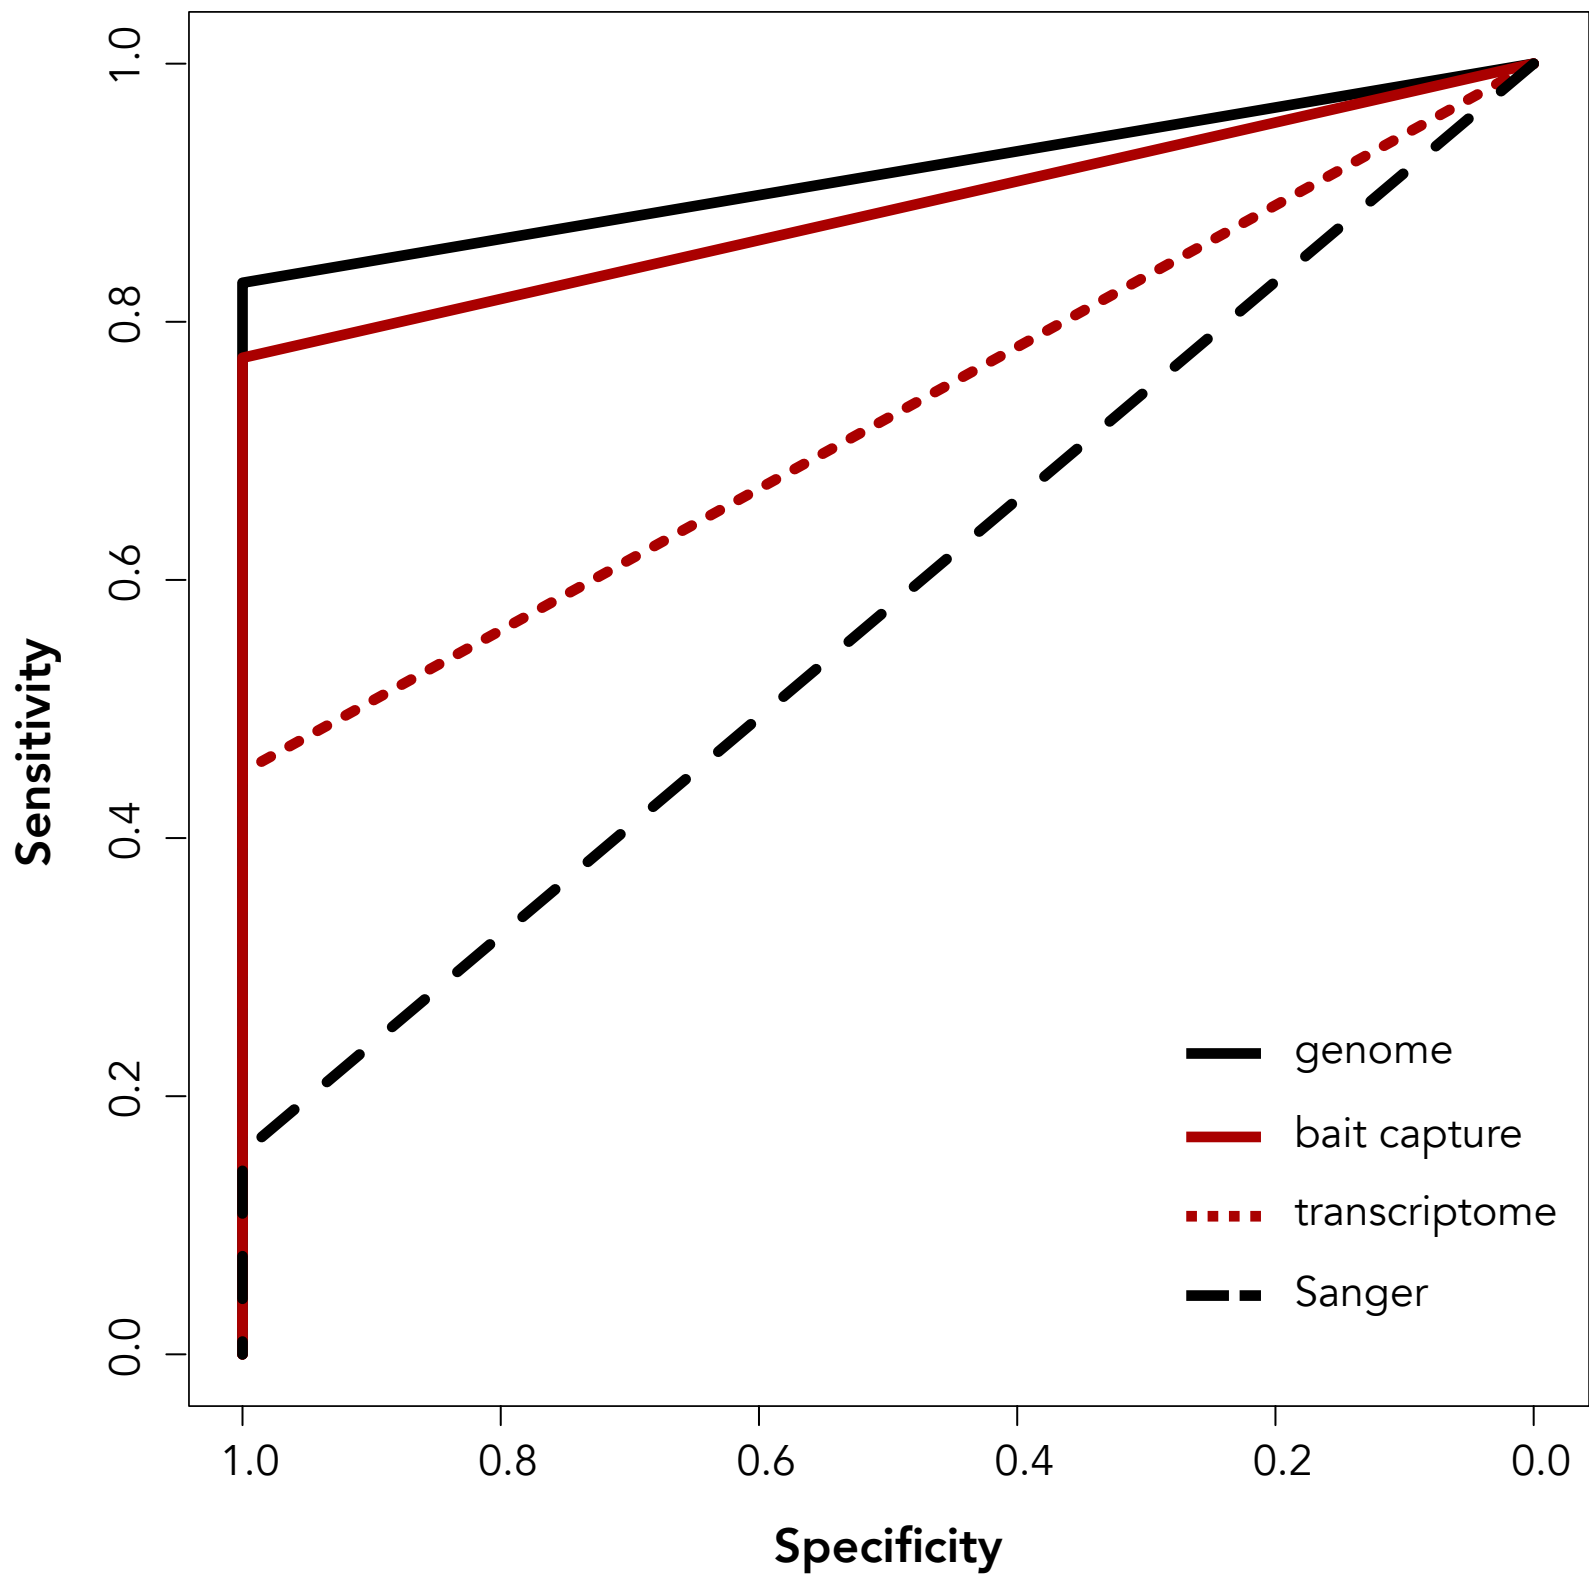

Source: https://www.biorxiv.org/content/10.1101/607994v1.full.pdf
